# Supplementary material for: Stepwise−Process−Controlled Ligand Management Strategy for Efficient and Stable Perovskite Quantum Dot Solar Cells
Source: MDPI journal article supplement (doi:10.3390/nano13233032), 2023-11-27
Supplement: s1 [file s1]

# Stepwise-Process-Controlled Ligand Management Strategy for Efficient and Stable Perovskite Quantum Dot Solar Cells

Jinfei Dai <sup>1,2,\*</sup>, Wei Guo <sup>1,2</sup>, Jie Xu <sup>3</sup>, Ruoyao Xu <sup>1,2</sup>, Jun Xi <sup>1,2</sup>, Hua Dong <sup>1,2</sup> and Zhaoxin Wu <sup>1,2,\*</sup>

- <sup>1</sup> Key Laboratory for Physical Electronics and Devices of the Ministry of Education School of Electronic Science and Engineering, Xi'an Jiaotong University, Xi'an 710049, China
  - <sup>2</sup> Shaanxi Key Lab of Information Photonic Technique, School of Electronic Science and Engineering, Xi'an Jiaotong University, Xi'an 710049, China
  - <sup>3</sup> College of Science, Xi'an University of Architecture and Technology, Xi'an 710055, China; jixu@xauat.edu.cn
- \* Correspondence: daijinfei123@xjtu.edu.cn (J.D.); zhaoxinwu@mail.xjtu.edu.cn (Z.W.)

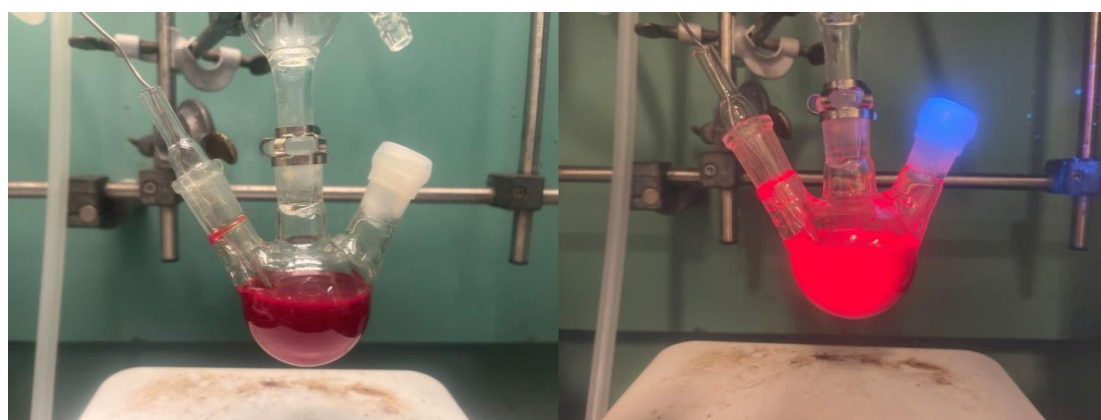

**Figure S1.** Photograph of as Synthesized CsPbI<sub>3</sub> nanocrystals under sunlight (left) and UV light (right).

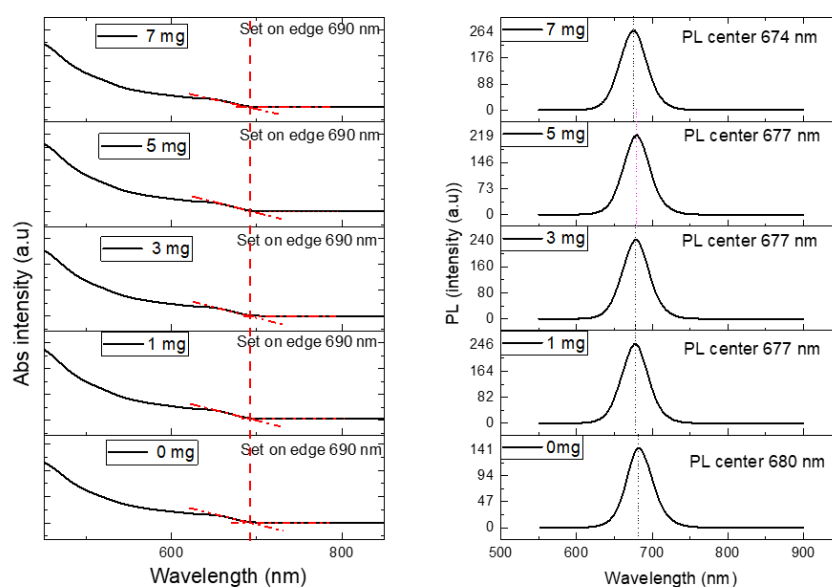

**Figure S2.** PL and UV-Vis absorption spectra of CsPbI<sub>3</sub> treated with different dose of BPA.

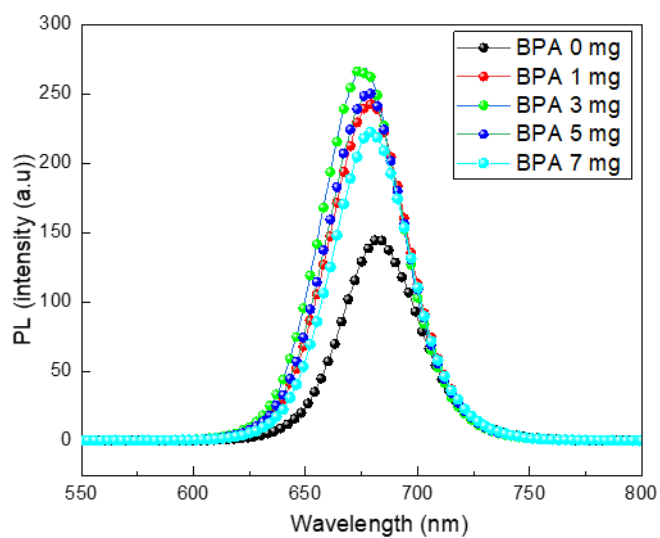

**Figure S3.** PL intensity of CsPbI<sub>3</sub> sample treated with different dose of BPA at the same optical density.

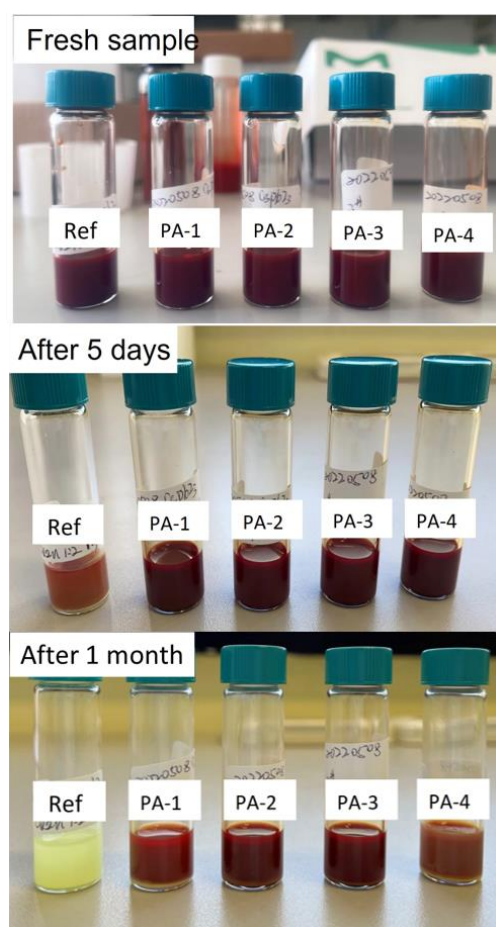

**Figure S4.** Photograph of CsPbI<sub>3</sub> sample treated with different dose of BPA and is varying with aging time.

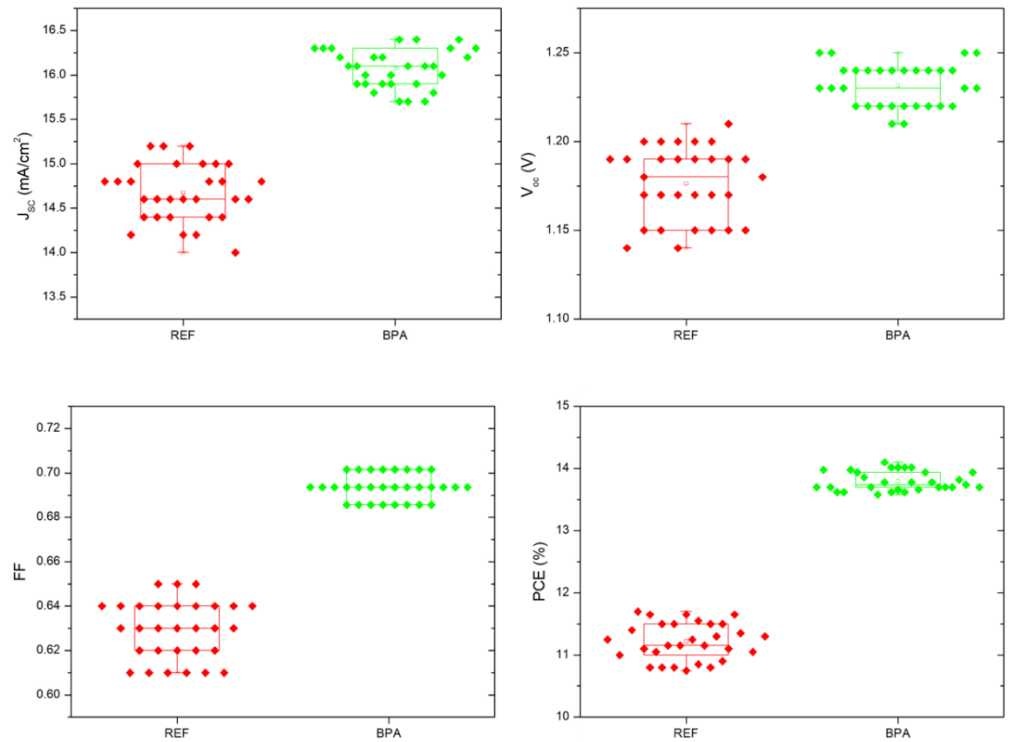

**Figure S5.** The statistical Photovoltaic Parameters of pristine and BPA-modified PQSCs.

### Fitting Process of TRPL.

The TRPL was carried out and fitted by a biexponential decay model:

$$I(t) = A_1 e^{-\left(\frac{t}{\tau_1}\right)} + A_2 e^{-\left(\frac{t}{\tau_2}\right)} + I_0$$

**Table S1.** Parameters of the time-resolved photoluminescence (TRPL) spectroscopy of control and BPA-modified perovskite films.

| Samples                | $\tau_1$ (ns) | A1 (%) | $\tau_2$ (ns) | A2 (%) | $\tau_{ave}$ (ns) |
|------------------------|---------------|--------|---------------|--------|-------------------|
| REF-CsPbI <sub>3</sub> | 3.98          | 15.25  | 35.19         | 84.75  | 30.42             |
| BPA-CsPbI <sub>3</sub> | 4.61          | 11.67  | 56.14         | 88.33  | 50.11             |

**Table S2.** Device design strategies and performance of CsPbI<sub>3</sub> PQSCs work recently.

| Device Structure                                                                 | PCE [%] | Ref. [no.] |
|----------------------------------------------------------------------------------|---------|------------|
| FTO/TiO <sub>2</sub> /CsPbI <sub>3</sub> PQDs/PTB7/Ag                            | 12.55   | [1]        |
| FTO/c-TiO <sub>2</sub> /m-TiO <sub>2</sub> /CsPbI <sub>3</sub> PQDs/Au           | 10.02   | [2]        |
| ITO/SnO <sub>2</sub> /CsPbI <sub>3</sub> PQDs/Spiro-OMeTAD/Ag                    | 13.66   | [3]        |
| FTO/ SnO <sub>2</sub> /CsPbI <sub>3</sub> PQDs/Spiro-OMeTAD/MoO <sub>x</sub> /Ag | 14.5    | [4]        |
| FTO/NiO <sub>x</sub> /CsPbI <sub>3</sub> PQDs/C <sub>60</sub> /ZnO/Ag            | 13.10   | [5]        |
| ITO/SnO <sub>2</sub> /CsPbI <sub>3</sub> PQDs/Spiro-OMeTAD/Ag                    | 16.53   | [6]        |
| ITO/SnO <sub>2</sub> /CsPbI <sub>3</sub> PQDs/Spiro-OMeTAD/ MoO <sub>x</sub> /Ag | 13.92   | Our work   |

**Table S3.** The statistical Photovoltaic Parameters of pristine and BPA-modified PQSCs.

| Structure              | V <sub>oc</sub> [V] | J <sub>sc</sub> [mA/cm <sup>2</sup> ] | FF [%]       | PCE [%]      |
|------------------------|---------------------|---------------------------------------|--------------|--------------|
| REF-CsPbI <sub>3</sub> | 1.16 ± 0.06         | 14.01 ± 1.45                          | 62.92 ± 2.53 | 11.03 ± 0.71 |
| BPA-CsPbI <sub>3</sub> | 1.21 ± 0.03         | 15.98 ± 1.29                          | 68.49 ± 2.06 | 13.47 ± 0.52 |

### tDOS

Impedance spectroscopy was measured by an Electrochemical Analyzer Meter (CHI 660d). The measurement condition for thermal admittance spectroscopy (TAS) is in the dark, without bias-voltage. The trap density of states was derived from the angle frequency dependent capacitance using the equation: The energetic profile of trap density of states (tDOS) can be derived from the angular frequency dependent capacitance using the equation:

$$N_T(E_\omega) = -\frac{V_{bi}}{qW} \frac{dC}{d\omega} \frac{\omega}{k_B T}$$

where  $C$  is the capacitance,  $\omega$  is the angular frequency,  $q$  is the elementary charge,  $k_B$  is the Boltzmann's constant, and  $T$  is the absolute temperature.  $V_{bi}$  and  $W$ , extracted from capacitance–voltage measurements, are the built-in potential and depletion width, respectively. The applied angular frequency  $\omega$  defines an energetic demarcation,

$$E_\omega = -k_B T \ln\left(\frac{\omega_0}{\omega}\right)$$

where  $\omega_0$  is the attempt-to-escape frequency. R(CR) equivalent circuit for fitting the impedance spectra:

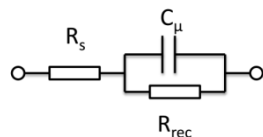

The trap states above the energy demarcation cannot contribute to the capacitance due to their slow rate to capture or emit charges.

### TPV and TPC measurement

For TPV and TPC measurements, the device is connected to the 100M  $\Omega$  /50  $\Omega$  input of the oscilloscope with constant background illumination provided by a white LED (Koh Hong B001). A perturbation is applied by pulsing a green LED at 530 nm (Kuang-Hong B033, Taiwan). An oscilloscope (TDS 2024B, Tektronix) recorded the resulting opto-voltage transients.

### References

1. Yuan, J.; Ling, X.; Yang, D.; Li, F.; Zhou, S.; Shi, J.; Qian, Y.; Hu, J.; Sun, Y.; Yang, Y.; et al. Band-Aligned Polymeric Hole Transport Materials for Extremely Low Energy Loss  $\alpha$ -CsPbI<sub>3</sub> Perovskite Nanocrystal Solar Cells. *Joule* **2018**, *2*, 2450.
2. Liu, Y.; Zhao, X.; Yang, Z.; Li, Q.; Wei, W.; Hu, B.; Chen, W. Cu<sub>12</sub>Sb<sub>4</sub>S<sub>13</sub> Quantum Dots with Ligand Exchange as Hole Transport Materials in All-Inorganic Perovskite CsPbI<sub>3</sub> Quantum Dot Solar Cells. *ACS Appl. Energy Mater.* **2020**, *3*, 3521.
3. Jia, D.L.; Chen, J.X.; Yu, M.; Liu, J.H.; Johansson, E.M.J.; Hagfeldt, A.; Zhang, X.L. Dual Passivation of CsPbI<sub>3</sub> Perovskite Nanocrystals with Amino Acid Ligands for Efficient Quantum Dot Solar Cells. *Small* **2020**, *16*, 2001772.
4. Lim, S.; Kim, J.; Park, J.Y.; Min, J.; Yun, S.; Park, T.; Kim, Y.; Choi, J. Suppressed Degradation and Enhanced Performance of CsPbI<sub>3</sub> Perovskite Quantum Dot Solar Cells via Engineering of Electron Transport Layers. *ACS Appl. Mater. Interfaces* **2021**, *13*, 6119–6129.
5. Shivarudraiah, S.B.; Ng, M.; Li, C.H.A.; Halpert, J.E. All-Inorganic, Solution-Processed, Inverted CsPbI<sub>3</sub> Quantum Dot Solar Cells with a PCE of 13.1% Achieved via a Layer-by-Layer FET Treatment. *ACS Appl. Energy Mater.* **2020**, *3*, 5620–5627.
6. Jia, D.L.; Chen, J.X.; Qiu, J.M.; Ma, H.L.; Yu, M.; Liu, J.H.; Zhang, X.L. Tailoring solvent-mediated ligand exchange for CsPbI<sub>3</sub> perovskite quantum dot solar cells with efficiency exceeding 16.5%. *Joule* **2022**, *6*, 1632–1653.
